# Supplementary material for: Unraveling landslide failure mechanisms with seismic signal analysis for enhanced pre-survey understanding
Source: Copernicus journal article supplement (doi:10.5194/nhess-25-451-2025), 2025-02-03
Supplement: Supplementary file 1 [file nhess-25-451-2025-supplement.pdf]

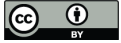

*Supplement of*

## **Unraveling landslide failure mechanisms with seismic signal analysis for enhanced pre-survey understanding**

**Jui-Ming Chang et al.**

*Correspondence to:* Che-Ming Yang ([stanleyyangcm@nuu.edu.tw](mailto:stanleyyangcm@nuu.edu.tw))

The copyright of individual parts of the supplement might differ from the article licence.

**Table S1** Source of field photos for landslides

| <b>Photos</b>            | <b>Sources</b>                                                                                                                                          | <b>Announced time</b>      |
|--------------------------|---------------------------------------------------------------------------------------------------------------------------------------------------------|----------------------------|
| Figure 1(c),<br>(d), (e) | <a href="https://thbu4.thb.gov.tw/News_Content_table.aspx?n=5066&amp;s=198478">https://thbu4.thb.gov.tw/News_Content_table.aspx?n=5066&amp;s=198478</a> | 15:27 on October 18, 2022  |
| Figure 1(f)              | <a href="https://thbu4.thb.gov.tw/News_Content_table.aspx?n=5066&amp;s=198469">https://thbu4.thb.gov.tw/News_Content_table.aspx?n=5066&amp;s=198469</a> | 17:41 on October 17, 2022. |
| Figure 1(g)              | <a href="https://thbu4.thb.gov.tw/News_Content_table.aspx?n=5066&amp;s=198468">https://thbu4.thb.gov.tw/News_Content_table.aspx?n=5066&amp;s=198468</a> | 14:46 on October 17, 2022. |
| Figure 1(h),<br>(i), (j) | <a href="https://thbu4.thb.gov.tw/News_Content_table.aspx?n=5066&amp;s=198460">https://thbu4.thb.gov.tw/News_Content_table.aspx?n=5066&amp;s=198460</a> | 15:52 on October 16, 2022. |

Last accessed: 30 October 2024

**Table S2** Weighting coefficient for grid-based single force by different signal-to-noise ratio (Chao et al., 2017)

| <b>Signal-to-noise ratio (SNR)</b> | <b>Weighting Coefficient</b> |
|------------------------------------|------------------------------|
| SNR $\geq$ 5.0                     | 1                            |
| 4.5 $\leq$ SNR <5.0                | 0.8                          |
| 4.0 $\leq$ SNR <4.5                | 0.6                          |
| 3.0 $\leq$ SNR <4.0                | 0.4                          |
| SNR<3.0                            | 0.1                          |

**Table S3** Seismometers for this research

| <b>Stations</b>                    | <b>Sensor</b>                                  | <b>Maintained institute</b>              |
|------------------------------------|------------------------------------------------|------------------------------------------|
| LATB, NNSB,<br>YHNB, NACB,<br>HGSD | Trillium 120PH, Trillium 240,<br>STS-2, CMG3TB | Academia Sinica                          |
| ENT                                | Short-period Seismometer<br>Model S-13         | Central Weather Administration, Taiwan   |
| V03G                               | 4.5 Hz 3-component-geophone                    | National Yang-Ming Chiao Tung University |

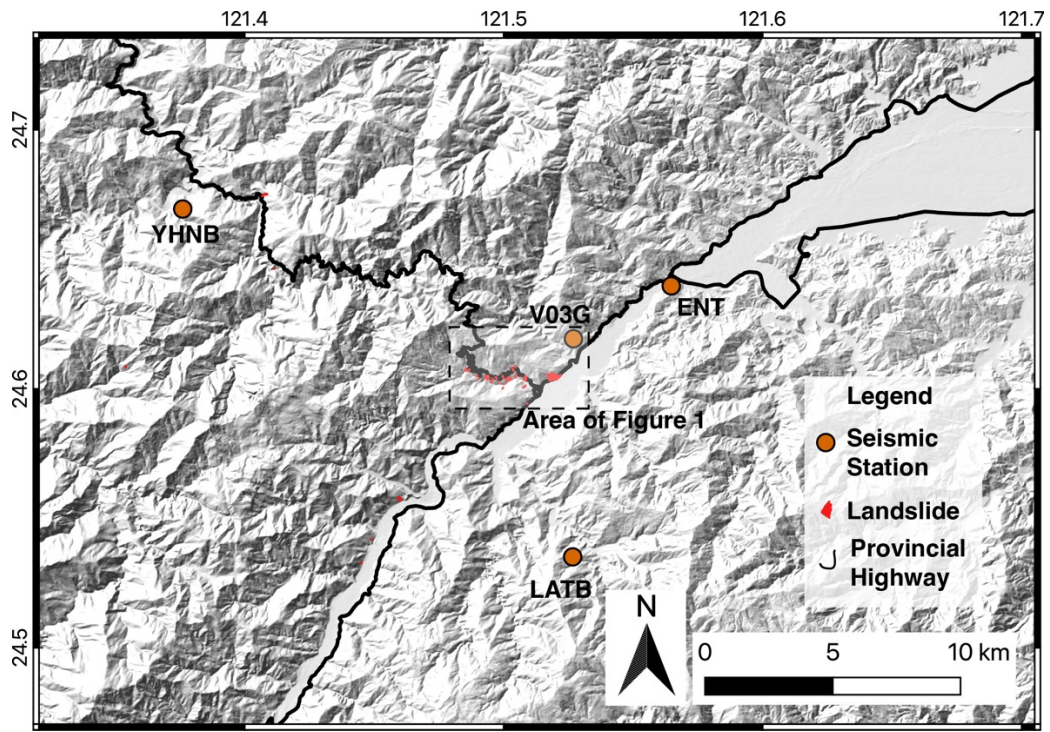

**Figure S1 Map of the Landslide distribution triggered by Typhoon Nesat.**

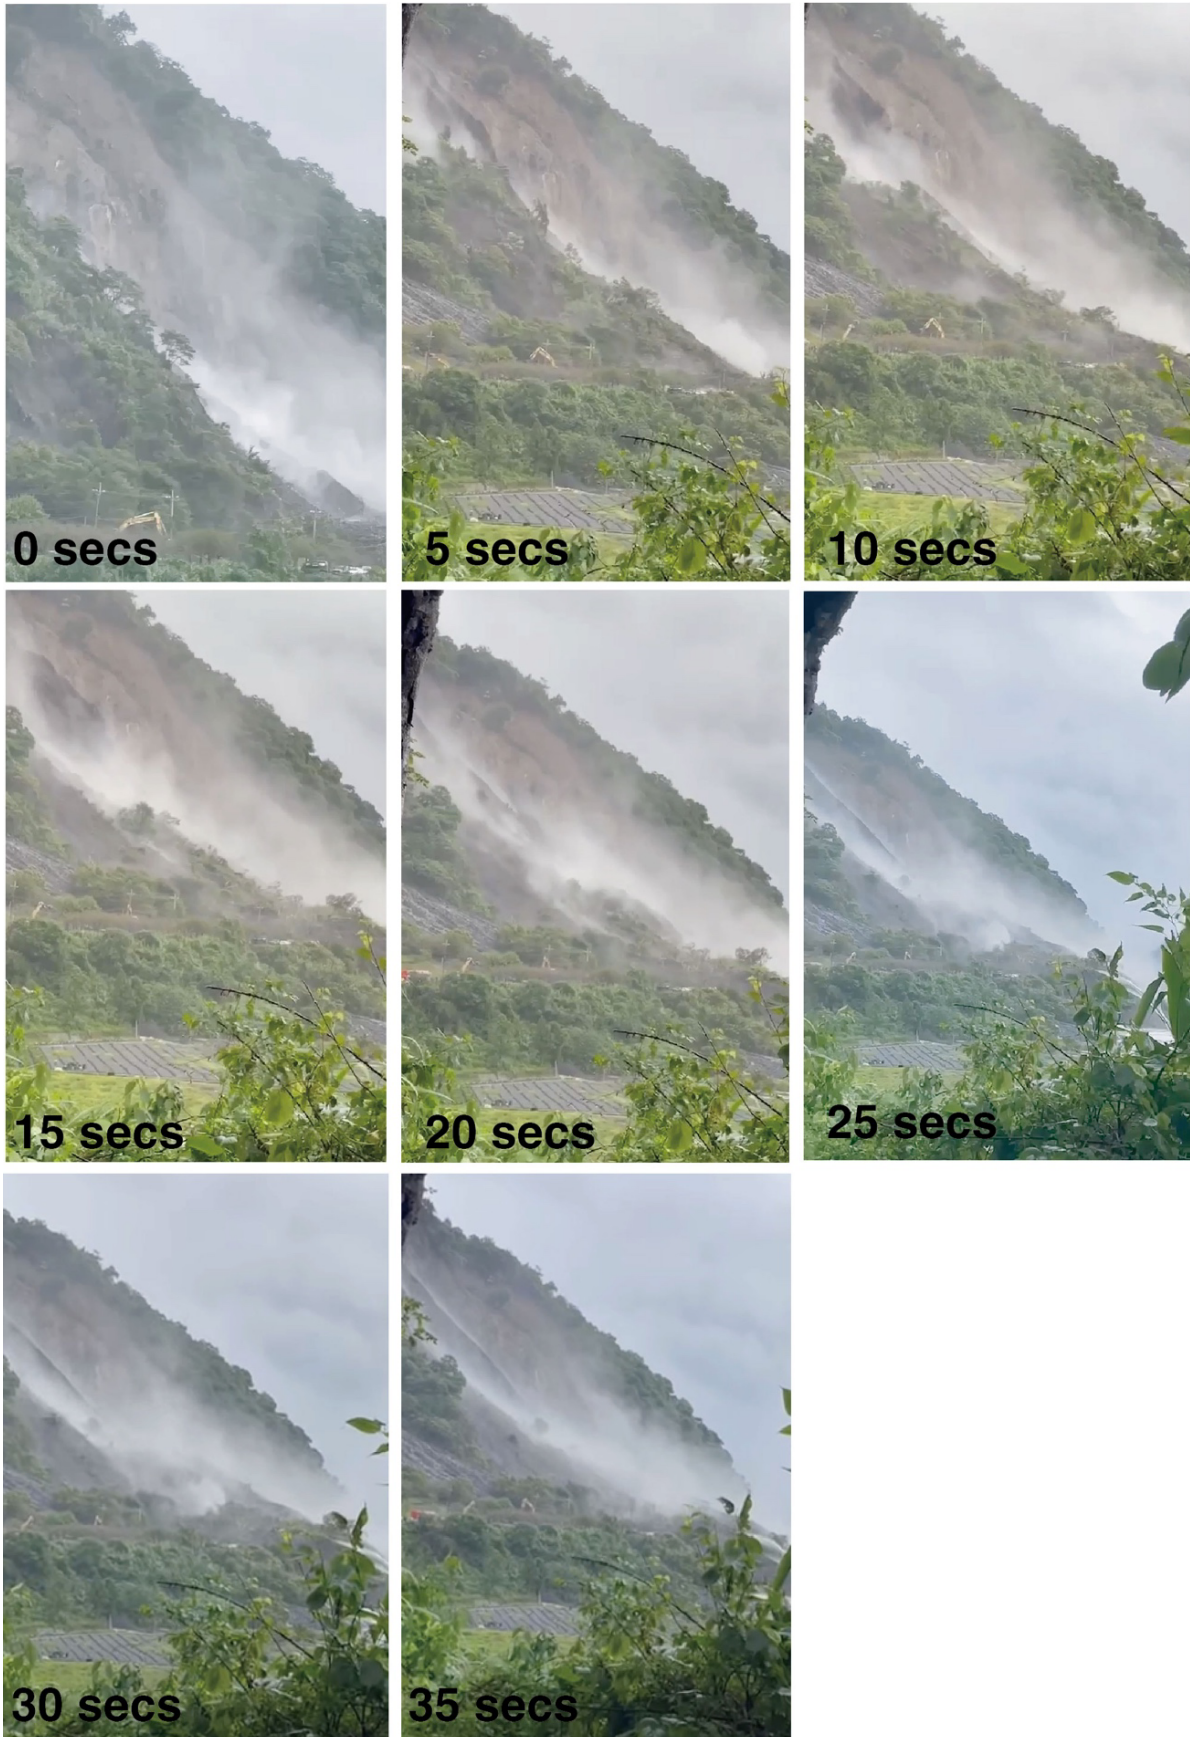

**Figure S2** Video caption at different moments of the CL. ([https://www.youtube.com/watch?v=cNz\\_Jlid5aI](https://www.youtube.com/watch?v=cNz_Jlid5aI); last accessed: 30 October 2024)

媒體報導台7甲線大面積崩塌，經查證為台7線86.5K~86.9K上方坡地崩塌，該路段已實施緊急性封路

公告期限：112-11-16 18:39

|      |                                                                                                                                                                                                                                                                                                                                                                                                                                                     |
|------|-----------------------------------------------------------------------------------------------------------------------------------------------------------------------------------------------------------------------------------------------------------------------------------------------------------------------------------------------------------------------------------------------------------------------------------------------------|
| 分類   | 重大新聞                                                                                                                                                                                                                                                                                                                                                                                                                                                |
| 公告日期 | 111-10-16 18:39                                                                                                                                                                                                                                                                                                                                                                                                                                     |
| 公告單位 | 第四區養護工程處-交通管理及控制中心                                                                                                                                                                                                                                                                                                                                                                                                                                  |
| 內容   | <p>受尼莎颱風外圍環流影響，宜蘭縣大同鄉英士路段二日已降下逾9百毫米超大豪雨，造成台7線86.5K~86.9K上方坡地集水區大量逕流水致土石崩塌災情，公路總局於(16)日上午動員大型機具進場搶修，原預計今(16)日17時搶通，惟坡地受持續性逕流水沖蝕，位址坡地於下午4時再度滑落大量土石泥流，並新增臨近台7線87.3k、86.7k二處坍方災點，影響增援機具挺進，道路雙向阻斷，3處災點搶災機具仍持續清坍搶修中，惟重現性土石泥流不斷淹沒道路，預估將延至明日中午12時搶通。公路總局呼籲用路人，東北部入秋後好發東北季風降雨，為防範行車風險，行駛山區道路請事先作好行程規劃，有豪雨警訊避免進入山區公路，並請多利用公路總局省道即時路況系統 (<a href="http://168.thb.gov.tw">http://168.thb.gov.tw</a>) 並隨時注意收聽廣播訊息。</p> <p>承辦單位: 獨立山工務段<br/>路況查詢電話：03-9962683</p> |

Figure S3 Announcement shown in Chinese of the exact landslide location from the Directorate General of Highways, Taiwan.

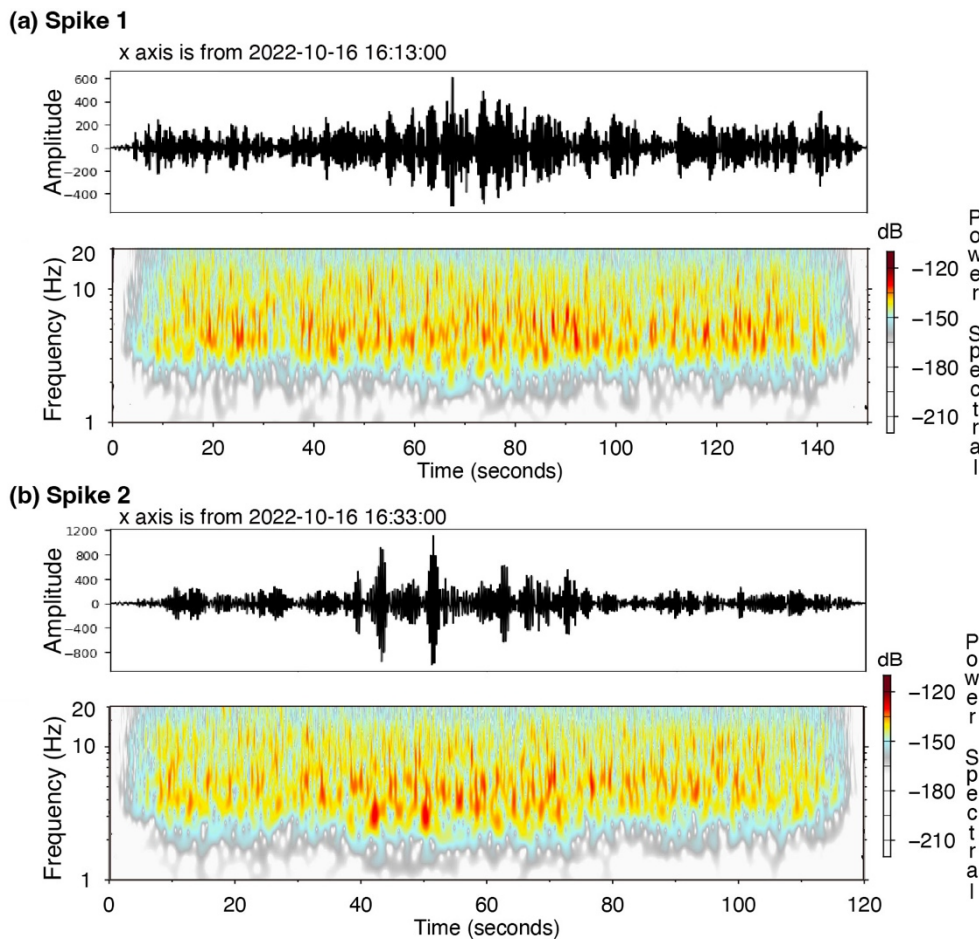

Figure S4 Spectrograms and waveforms of (a) spike 1 and (b) spike 2.

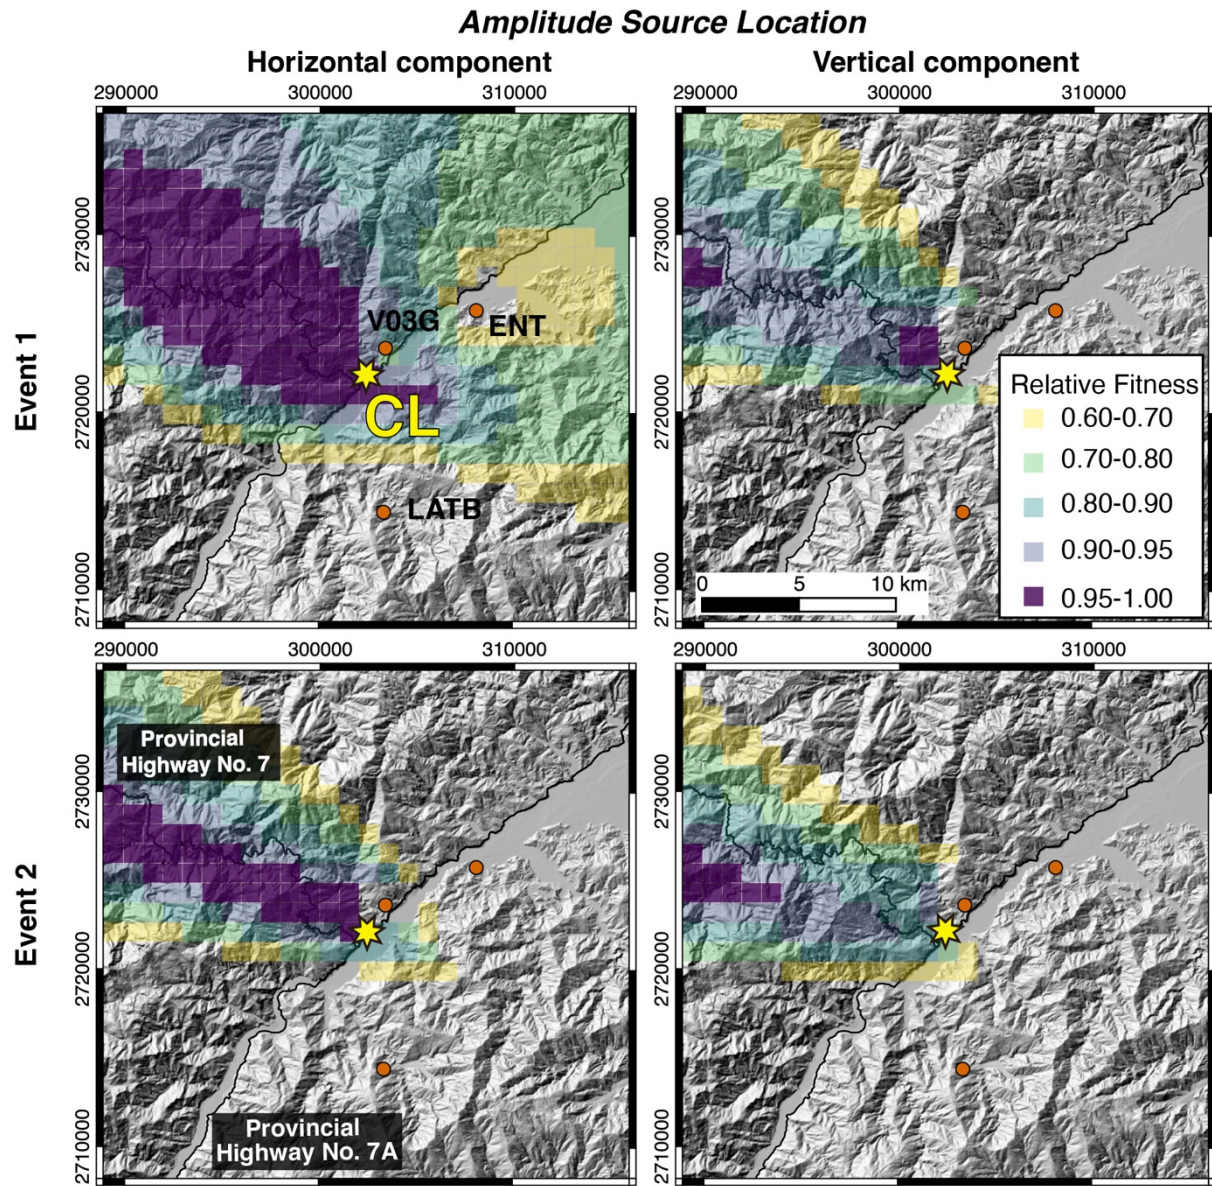

**Figure S5** Location determination by amplitude source location of horizontal and vertical components data for Event 1 and Event 2.

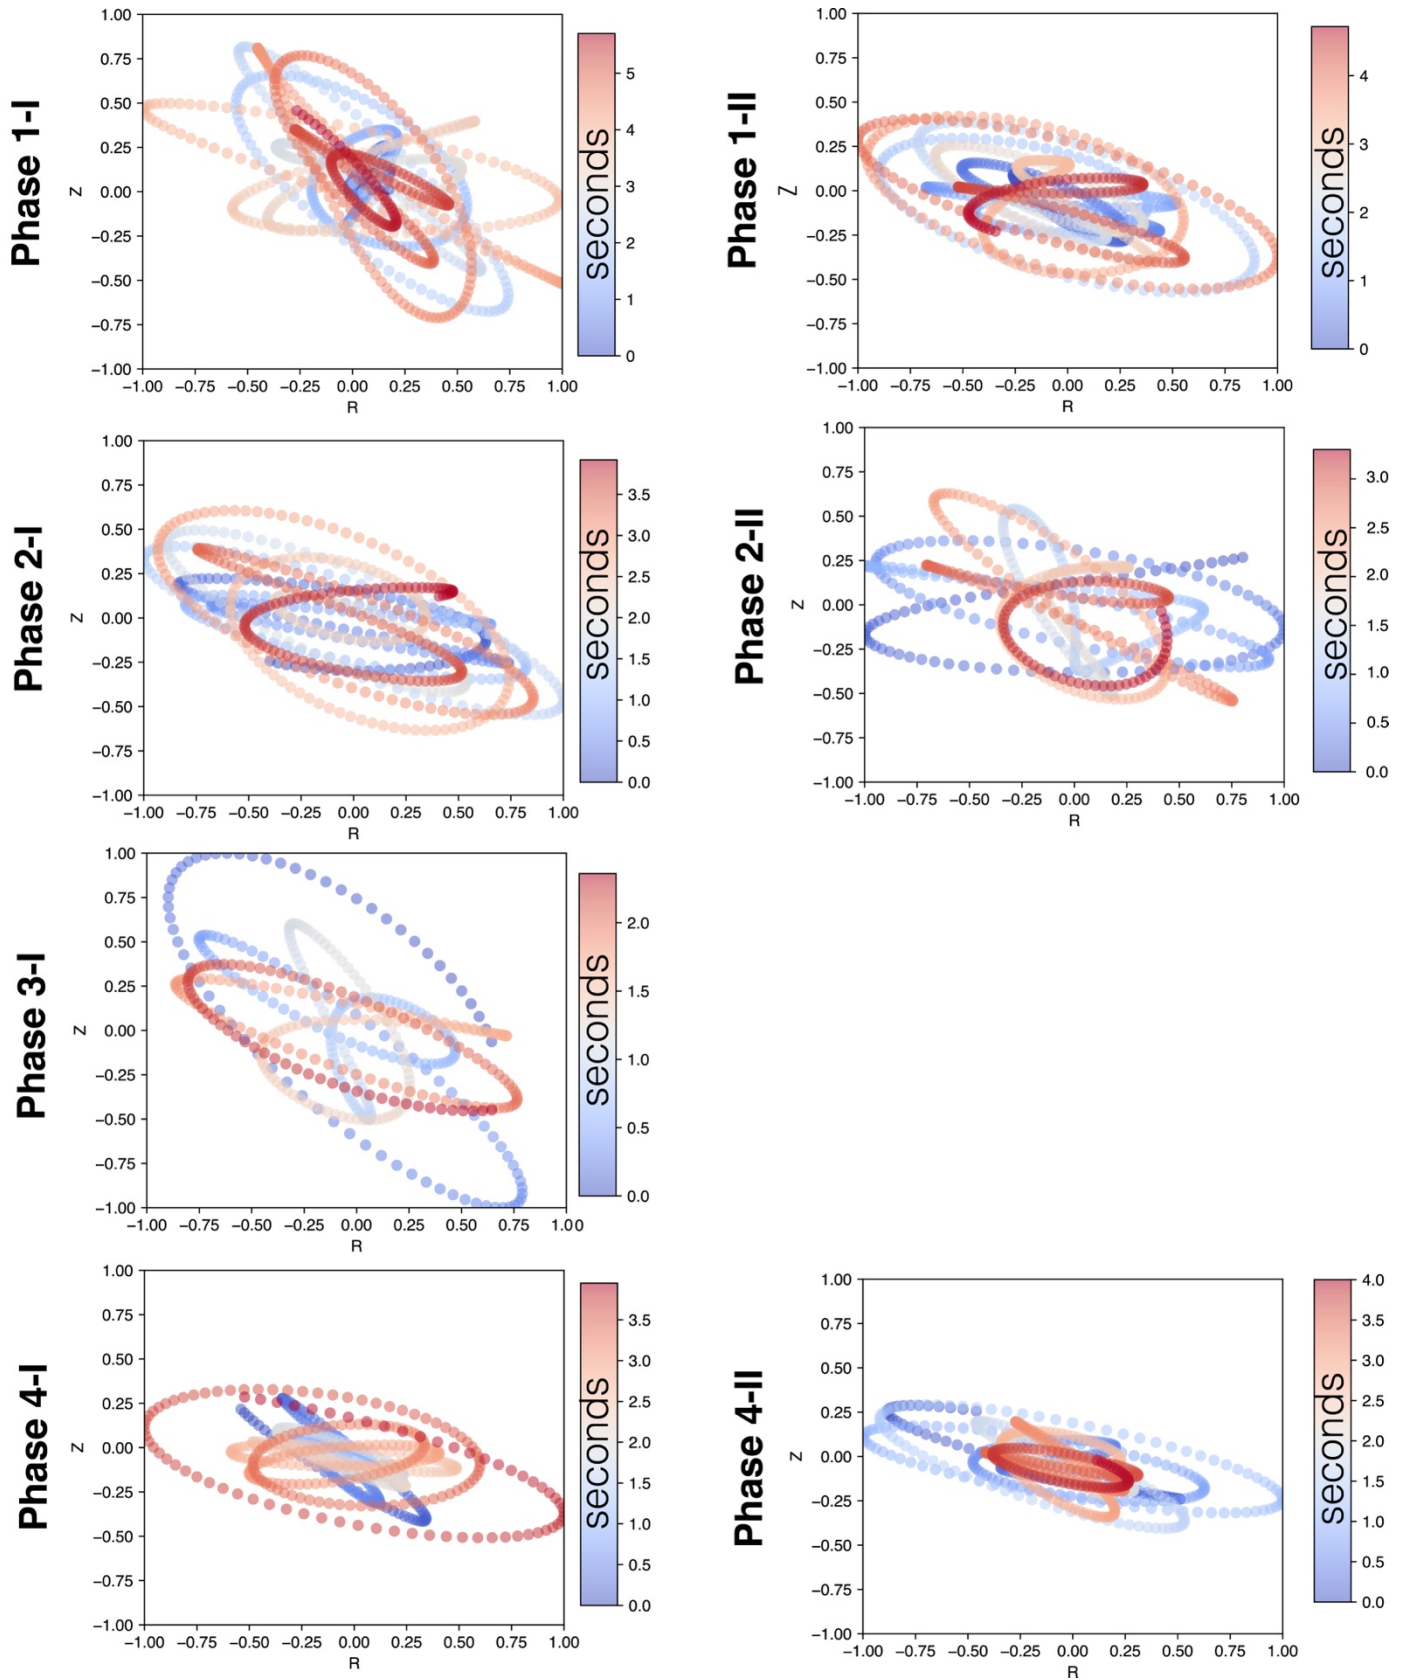

**Figure S6** Particle motion of Event 1 for different sliding phases with vertical (Z) and radial(R) components.

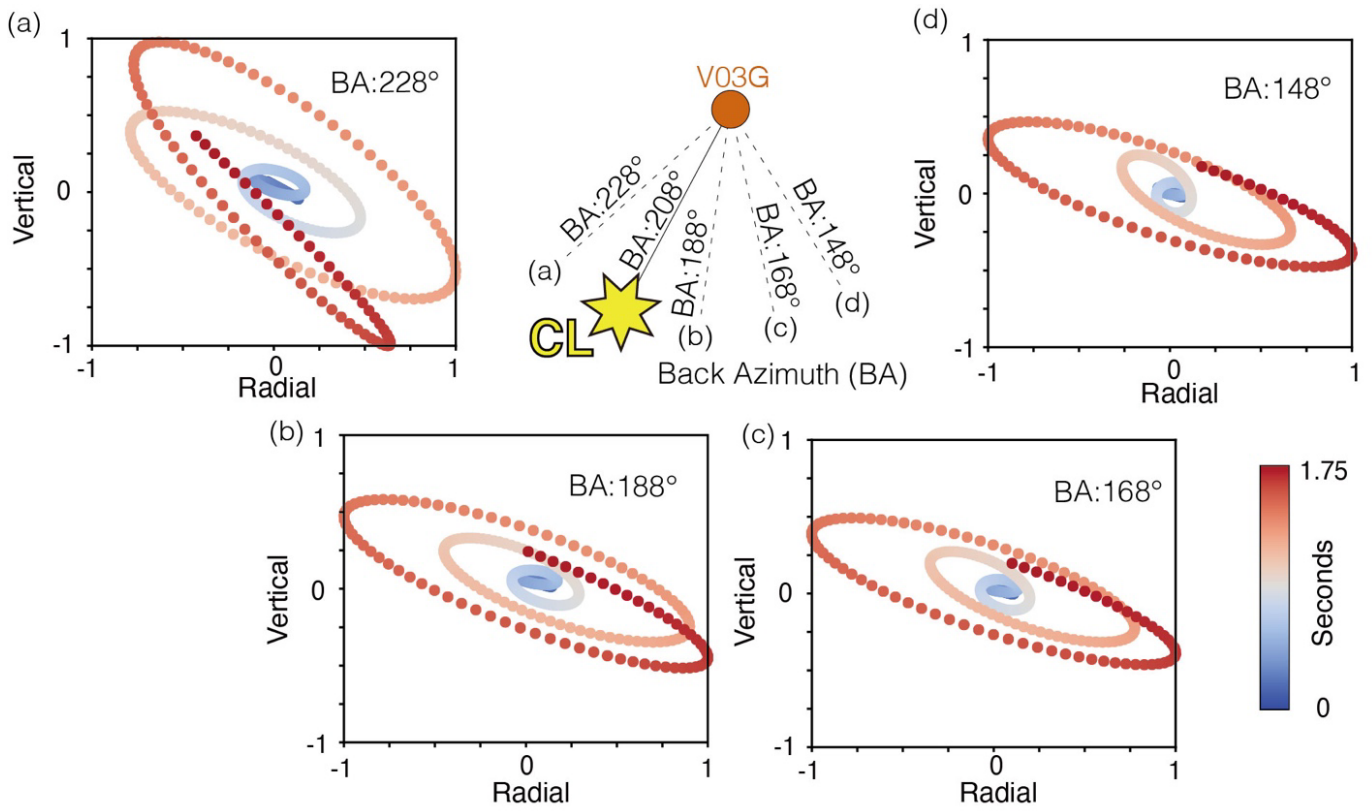

**Figure S7** Particle motion of Event 2 rotating different back azimuths to radial components. (a) 228°, (b) 188°, (c) 168°, and (d) 148°.



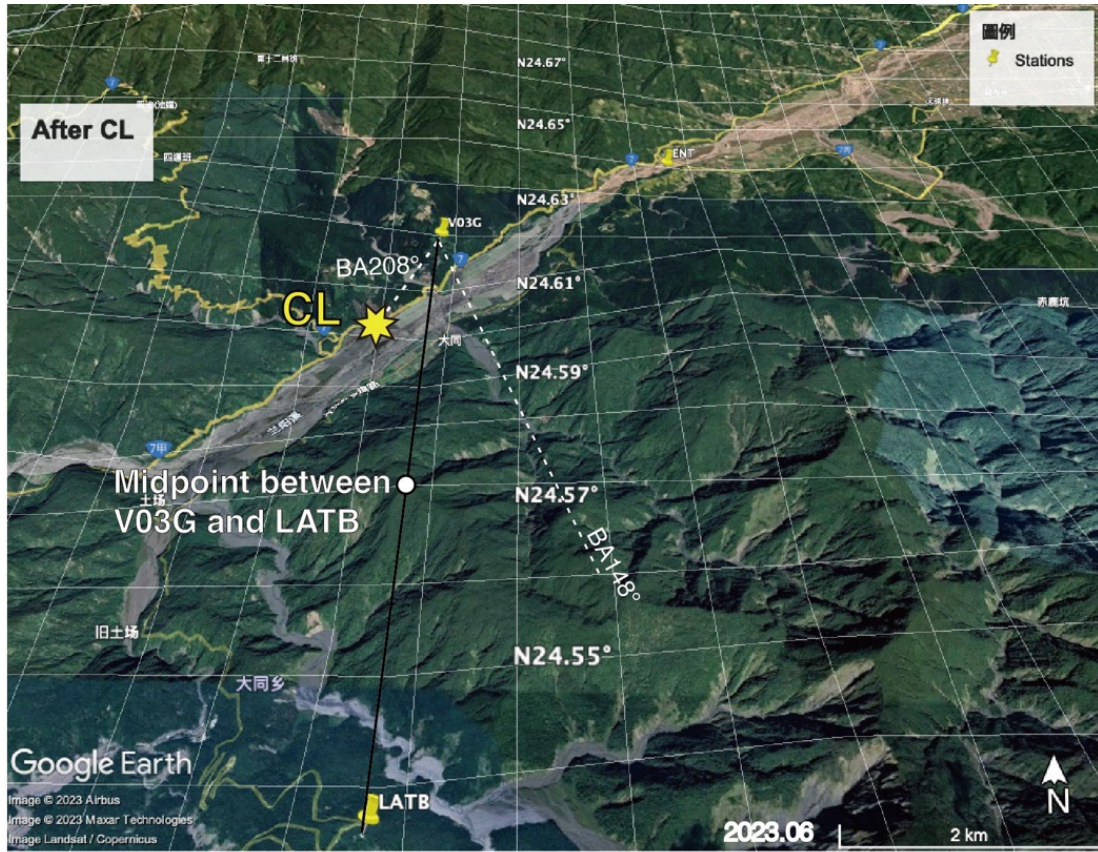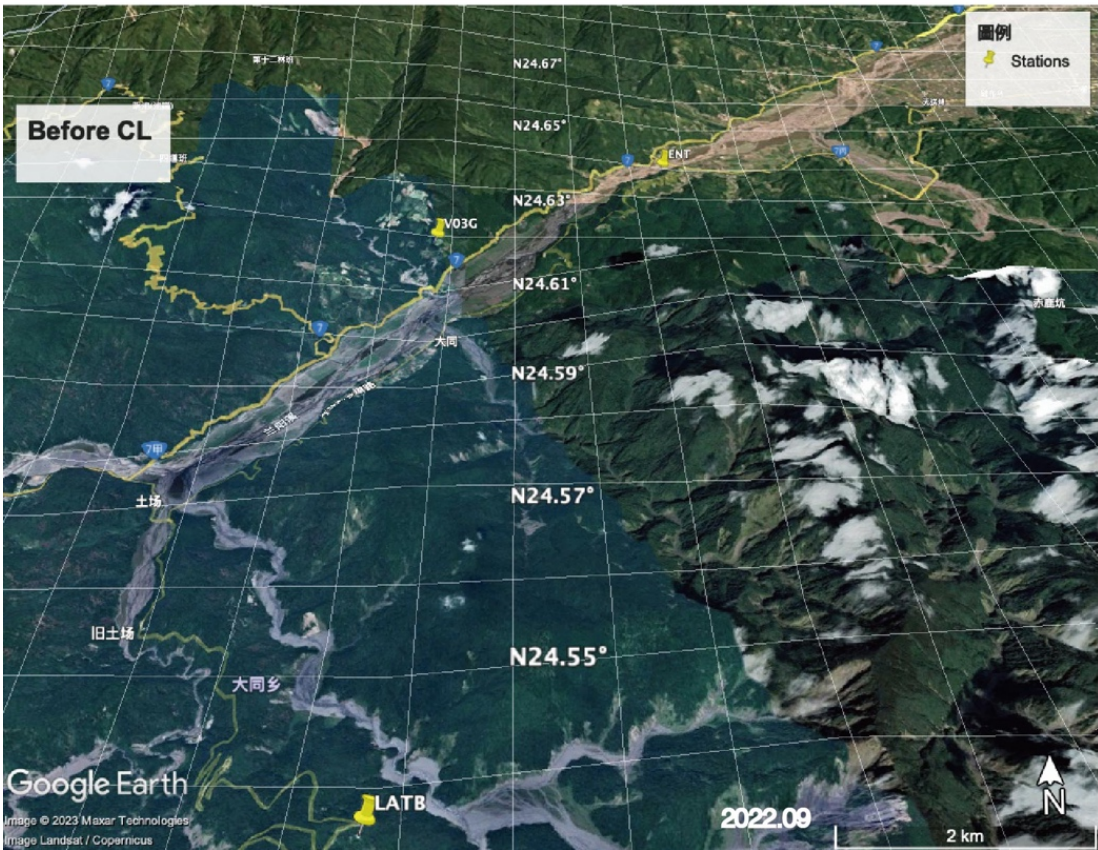

Figure S8 Satellite image before and after the CL.
